# Supplementary material for: Cell-cycle-independent transitions in temporal identity of mammalian neural progenitor cells
Source: PubMed Central journal article supplement (PMC4842982; doi:10.1038/ncomms11349), 2016-04-20
Supplement: ncomms11349-s1.pdf [file ncomms11349-s1.pdf]

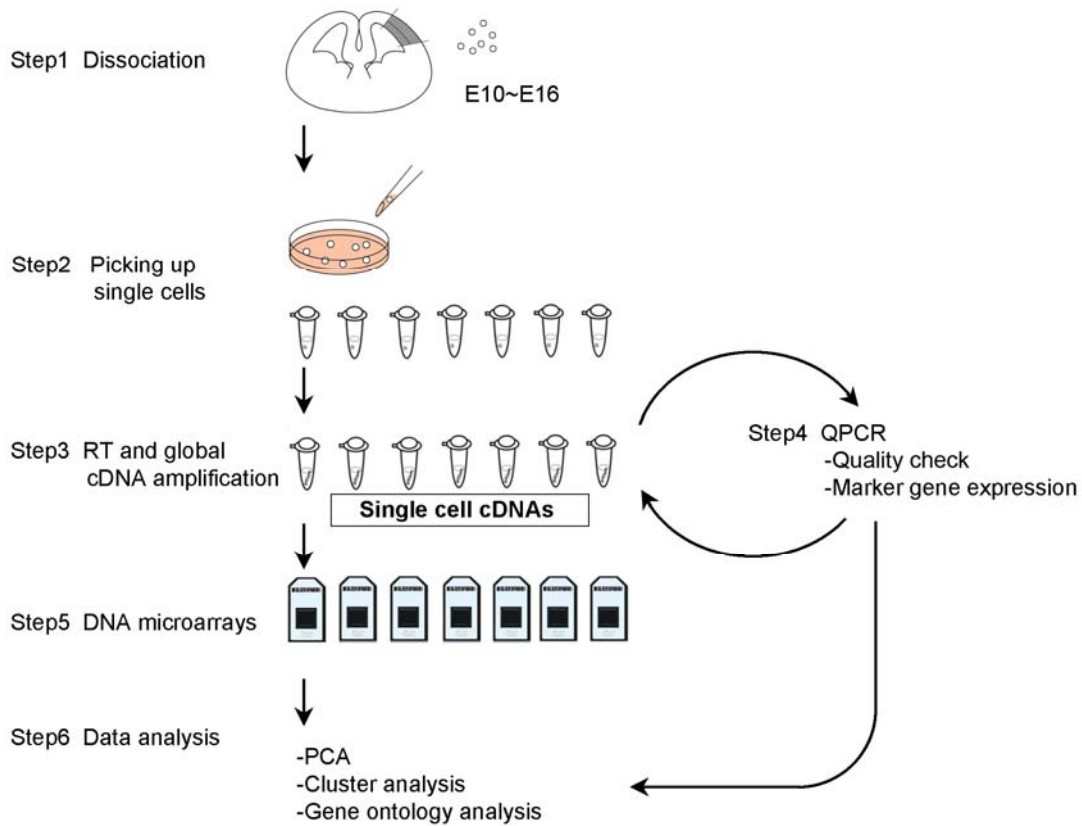

**Supplementary Figure 1. Experimental design.**

Step1: The dorso-lateral portion of the cerebral wall (E10–E13) or VZ/SVZ fragment of the same portion of the cerebral wall (E14–E16) was dissected and dissociated by trypsin.

Step2: Single cells were manually selected at random by using a glass capillary.

Step3: After cell lysis, single cell cDNAs were generated by reverse transcription and global amplification.

Step4: The quality of cDNAs and marker gene expression were examined by QPCR.

Step5: Selected samples (Supplementary Table 1) were analyzed by DNA microarrays (E11, E12, E14, and E16).

Step6: Data from microarrays or QPCR were analyzed by PCA, cluster analysis or gene ontology analysis.

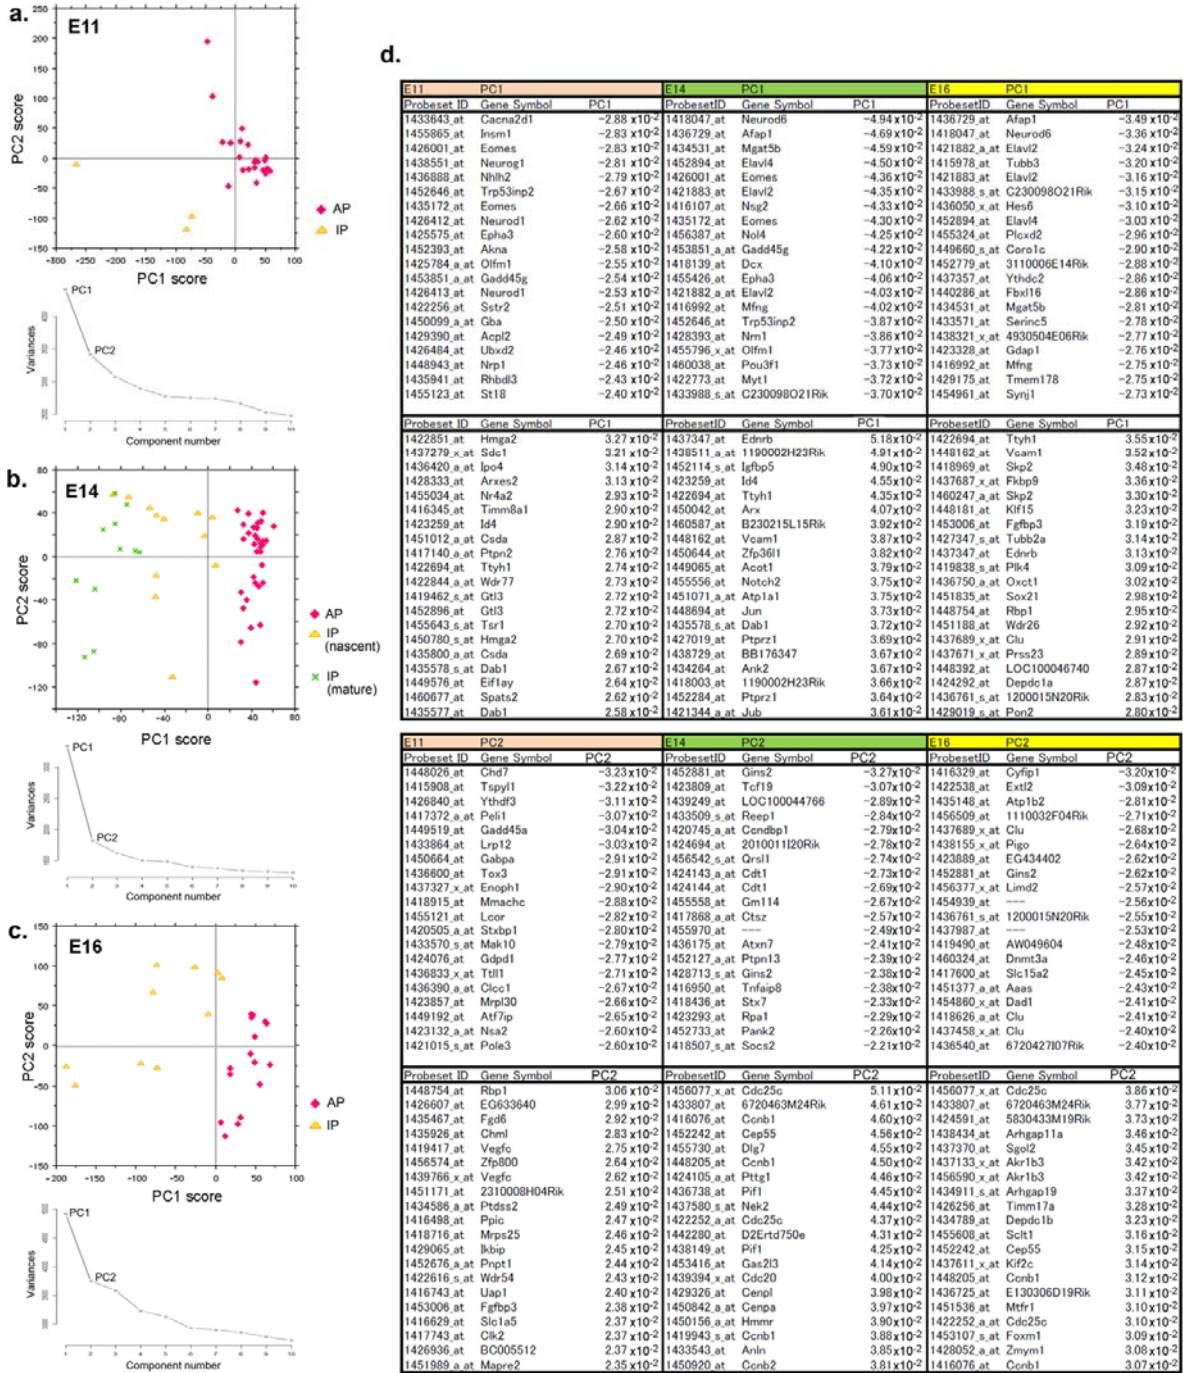

**Supplementary Figure 2. Unsupervised PCA reveals that the ‘AP vs. IP axis’ mostly reflects the variety of progenitor cells at each stage.**

(a–c) PCA was performed on progenitor samples at each stage, using all available probe set data (17192 probe sets; a, E11, N = 26; b, E14, N = 56; c, E16, N = 27). Each symbol indicates one cell, and the categorization of the symbols (AP or IP) is based on the classification from the results shown in Fig. 1b–d. Principal component 1 (PC1) defined the axis along which the variance in gene expression was largest among the tested cells. At E14, the PC1 axis clearly depicted the differentiation state of progenitors; APs, nascent IPs, and mature IPs were plotted as different groups along the axis in that order (b). This order was reproduced in the case of E11 (a) and E16 cells (c). Scree plots were also shown.

Proportion of variances: (a) 0.071 for PC1, 0.055 for PC2, (b) 0.051 for PC1, 0.028 for PC2, and (c) 0.070 for PC1, 0.053 for PC2.

**(d)** Genes that contribute highly to PC1 and PC2 of E11, E14, and E16 progenitors.

Lists show the top 20 genes that contribute most strongly to PC1 or PC2, positively or negatively, based on the results of the PCA shown in (a–c). According to the functional annotation clustering analysis, genes that contribute highly to PC1 at E11, E14, and E16 were significantly related to ‘differentiation’ or ‘neuron differentiation’ (N = 40, 40, and 100 probe sets for each) ( $p = 1.5 \times 10^{-4}$ ,  $6.6 \times 10^{-5}$ ,  $1.8 \times 10^{-4}$ , respectively), and those contributing to PC2 at E14 or E16 (N = 40 probe sets each) were significantly related to the ‘cell cycle’ ( $p = 1.5 \times 10^{-13}$  and  $p = 5.9 \times 10^{-4}$ ), suggesting that the PC2 scores at E14 and E16 reflected the cell-cycle phase of the tested cells.

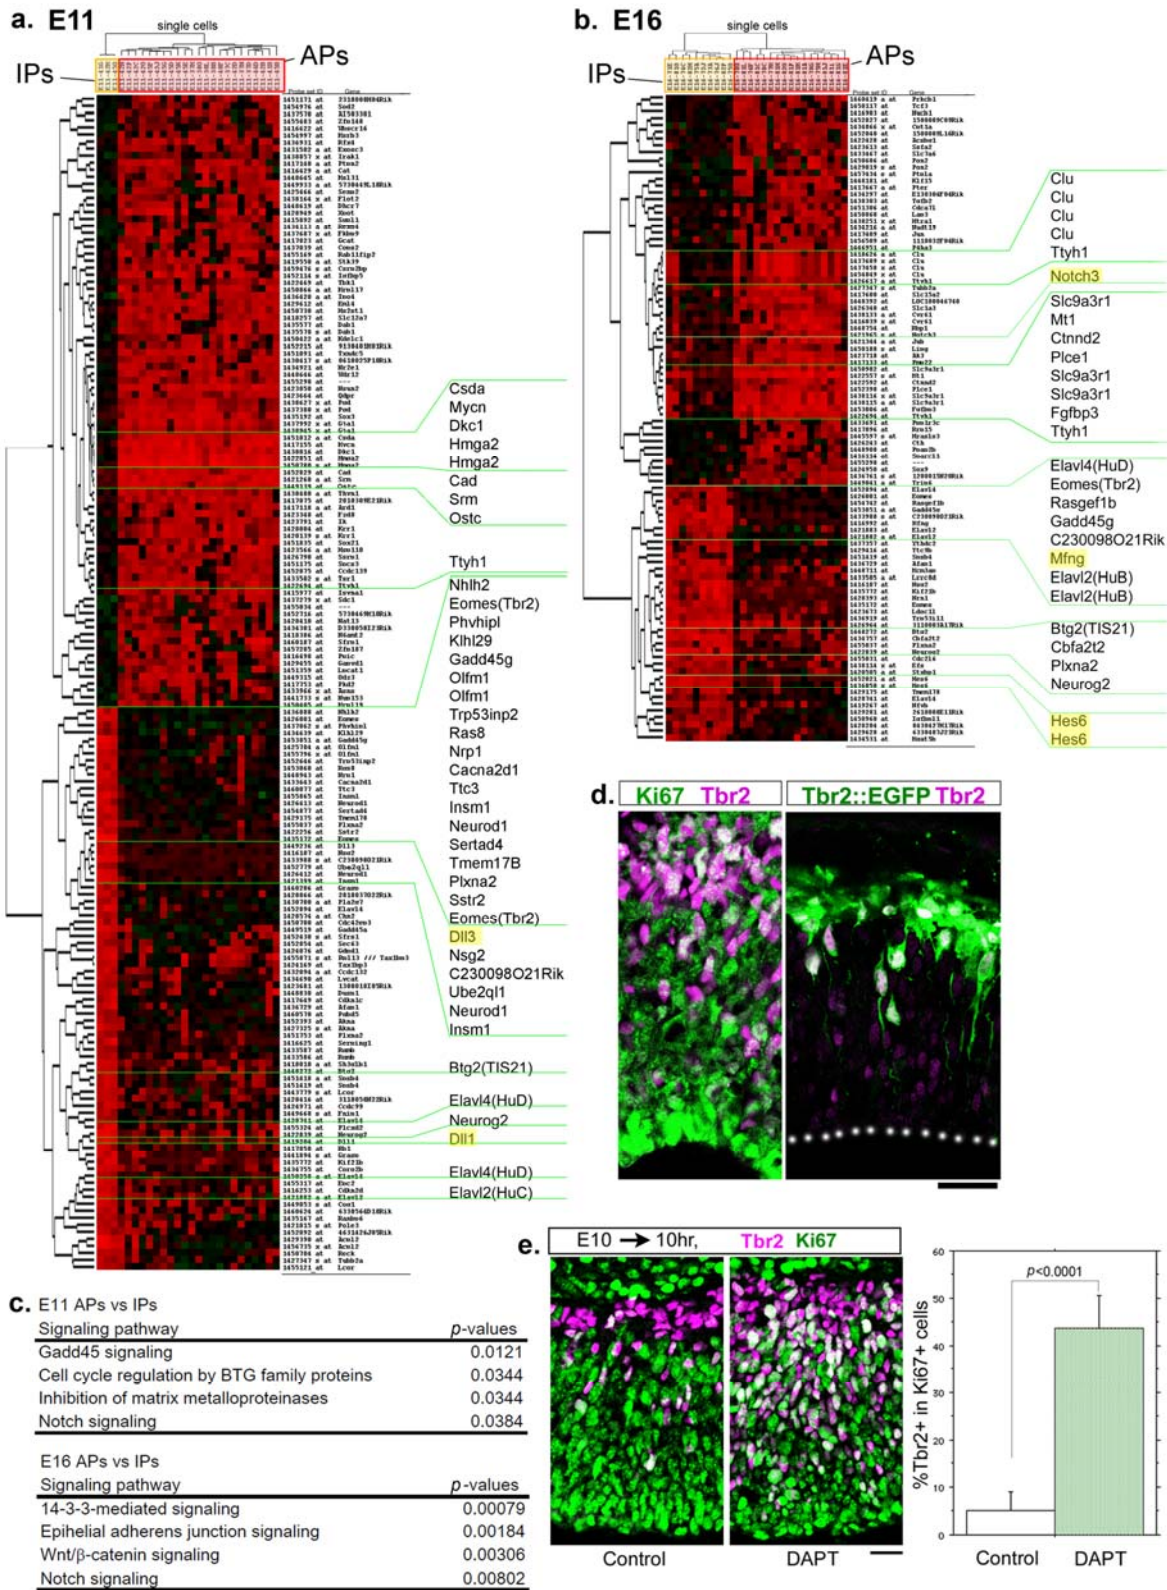

**Supplementary Figure 3. Differentially expressed genes between AP and IP at E11 and E16.**

(a, b) Two-way clustering analysis using the significantly differently expressed genes between APs and IPs at E11

(N = 23 APs vs. N = 3 IPs, 167 probe sets were selected [from 17192 total probe sets] by Welch's *t*-test according to the

following criteria:  $|\text{Log Fold}| > 4.0$ ,  $\text{FDR} < 0.1$ ), or at E16 ( $N = 17$  APs vs.  $N = 10$  IPs, 96 probe sets were selected [from 17192 total probe sets] by Welch's  $t$ -test according to the following criteria:  $|\text{Log Fold}| > 3.0$ ,  $\text{FDR} < 0.1$ ). Many of the IP-specific genes are common among E11, E14<sup>1</sup>, and E16.

(c) Pathway analysis (Ingenuity Pathway Analysis, IPA) of differentially expressed genes between APs and IPs at E11 (a) or E16 (b) revealed that the Notch-signaling pathway was the significantly different canonical signaling pathways in both stages.

(d)  $\text{Tbr2}^+$  cells commit to become IPs in the E11 cerebral wall. (left) Double immunostaining of the E11 cerebral wall with antibodies against Ki67 (green) and Tbr2 (magenta).  $\text{Ki67}^+$  progenitor cells include both  $\text{Tbr2}^-$  and  $\text{Tbr2}^+$  cells. (right) EGFP (green) and Tbr2 (magenta) expression in the cerebral wall of the E11  $\text{Tbr2}::\text{EGFP}$  BAC transgenic mouse<sup>2,3</sup>. Because EGFP is a relatively stable protein, EGFP could be used to short-chase the fate of  $\text{Tbr2}^+$  cells<sup>1</sup>. There were no  $\text{EGFP}^+/\text{Tbr2}^-$  cells in the VZ, suggesting that once cells express Tbr2, they never return to the apical surface as  $\text{Tbr2}^-$  apical progenitor cells. Dotted line, apical surface.

(e) Inhibition of Notch signaling converts the E10 APs to the IPs. 10  $\mu\text{M}$  of Notch inhibitor DAPT or control DMSO was added into the medium of the E10 telencephalon tissue culture for 10 hours. The frequency of  $\text{Tbr2}^+$  cells in  $\text{Ki67}^+$  progenitors was significantly increased by DAPT treatment ( $p < 0.0001$ , Mann-Whitney U test, means  $\pm$  s.d.). Bar, 30  $\mu\text{m}$ .

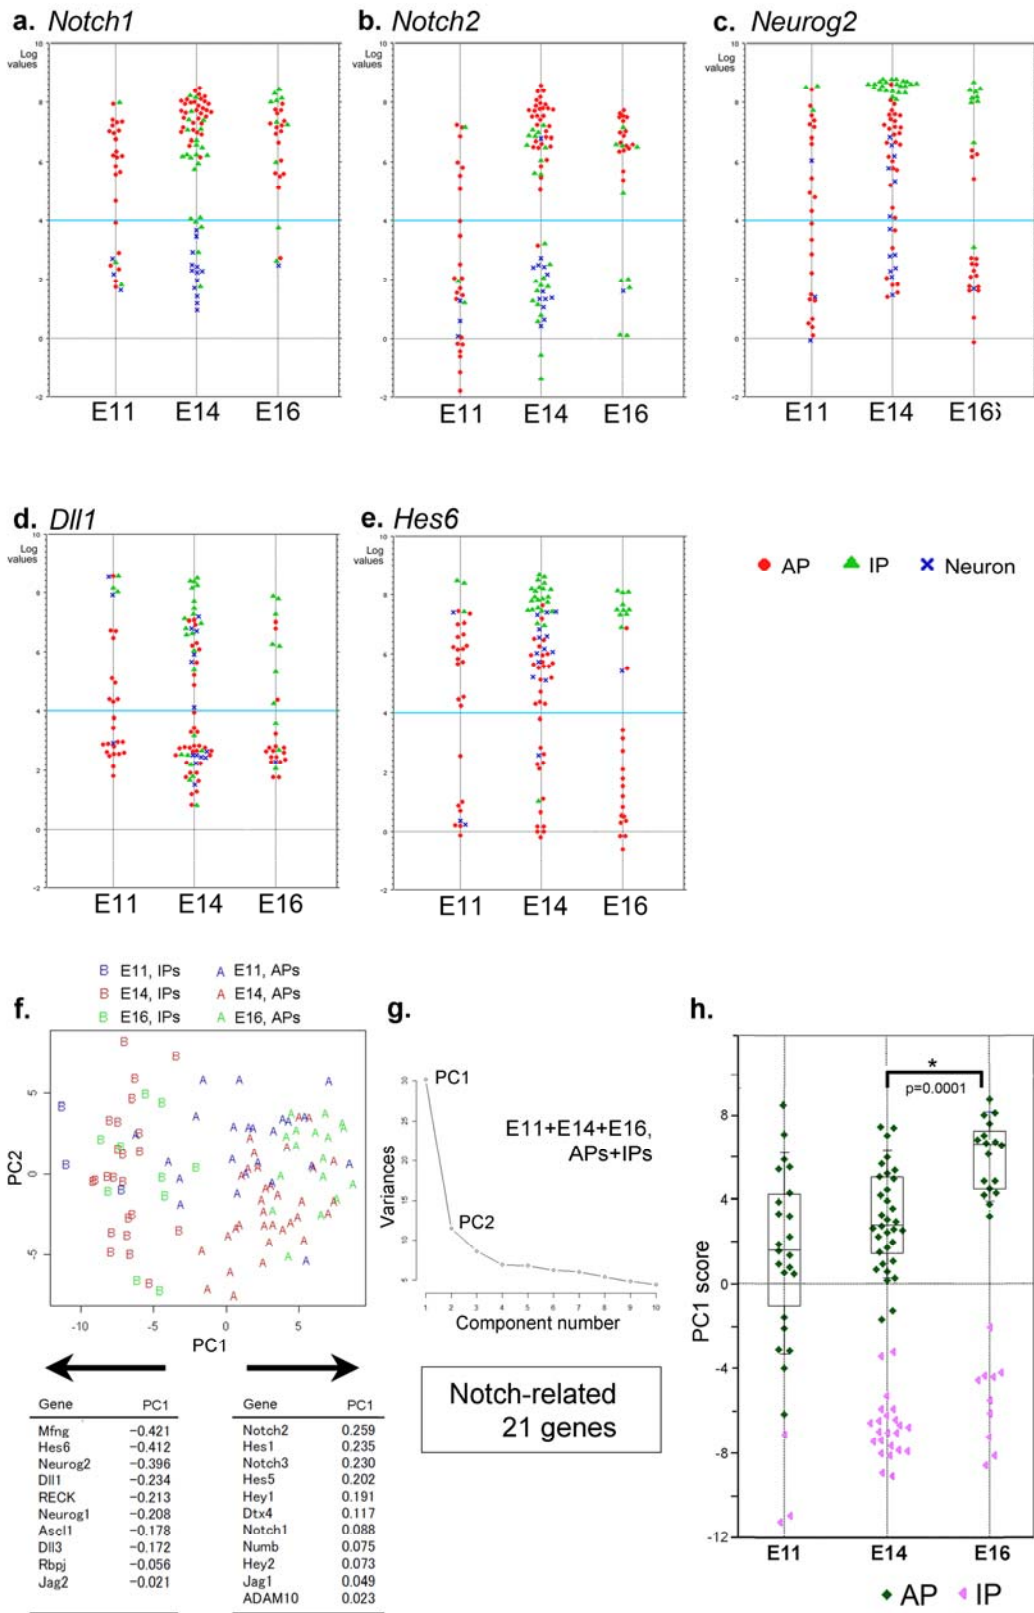

**Supplementary Figure 4. Cell-to-cell variation of Notch signaling-related gene expression in APs changes over the course of cortical development.**

(a–e) *Notch1*, *Notch2*, *Neurog2*, *Dll1*, and *Hes6* expression levels in the cortical cells. Scatter diagrams of microarray

data from 30, 70, and 28 single-cell cDNAs at E11, E14, and E16, respectively. Each symbol indicates one cell, and axes are in the natural logarithmic scale.

**(f-h)** To describe how the variation of Notch signaling status among cortical progenitor cells changes during cortical development, PCA on all progenitor cells (E11 + E14 + E16, APs + IPs, N = 109) was performed, using the expression values of the 21 genes related to Notch signaling (f).

**(f)** Score plot of the PC1 and PC2 values for all tested progenitor cells. Each symbol represents one progenitor cell. The contribution of each gene to the PC1 is shown in the bottom tables.

**(g)** The scree plot of (f) indicated that PC1 outstandingly represented the gene expression variation, and validated the PC1 score (h) as an indicator of 'Notch signaling status'. Proportion of variance, 0.2616 (PC1),

**(h)** Scatter diagram of the PC1 scores for E11, E14, and E16 progenitor cells. The PC1 scores of E11 APs were highly variable, ranging from negative to positive values. As development proceeded, this variation became smaller (*F*-test, E11 vs. E14,  $p = 0.0209$ ; E11 vs. E16,  $p = 0.0014$ ), and the mean PC1 score increased, as in APs (Mann-Whitney *U* test, E14 vs. E16,  $p = 0.0001$ ). Each symbol represents one progenitor cell.

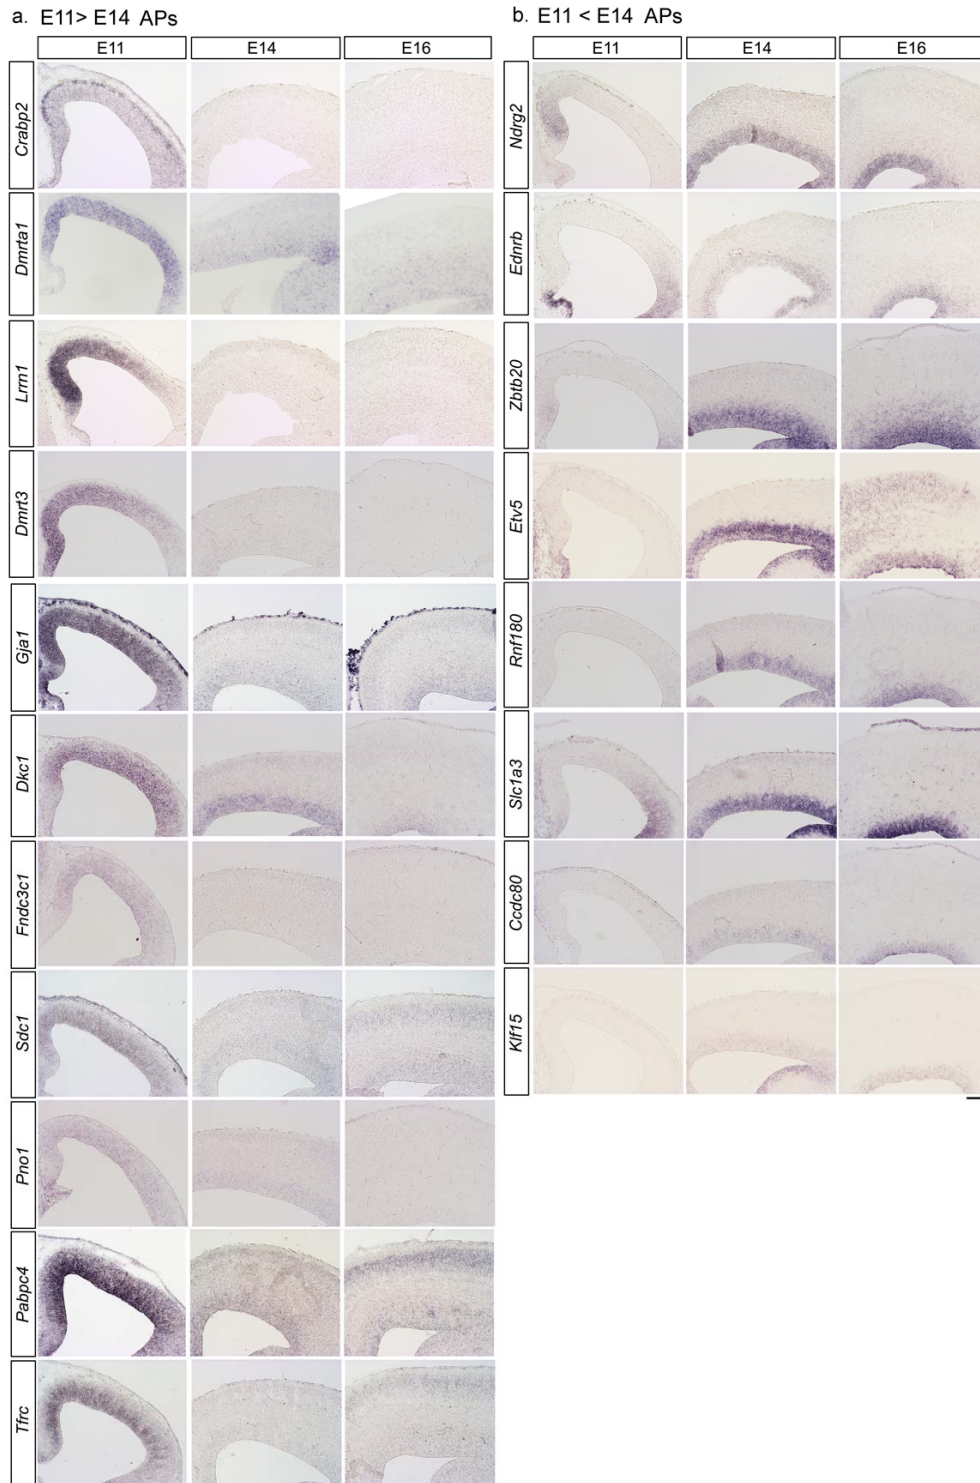

**Supplementary Figure 5. *In situ* expression pattern of genes whose expression levels change between E11 and E14 in APs.**

Temporal changes in genes selected from single-cell gene-expression profiles of APs (Fig. 2a, Supplementary Data 1) were also observed by *in situ* hybridization of E11, E14, and E16 mouse cerebral wall. Results from E11 > E14 genes (**a**) and E11 < E14 genes (**b**) are shown. Bar, 100 $\mu$ m.



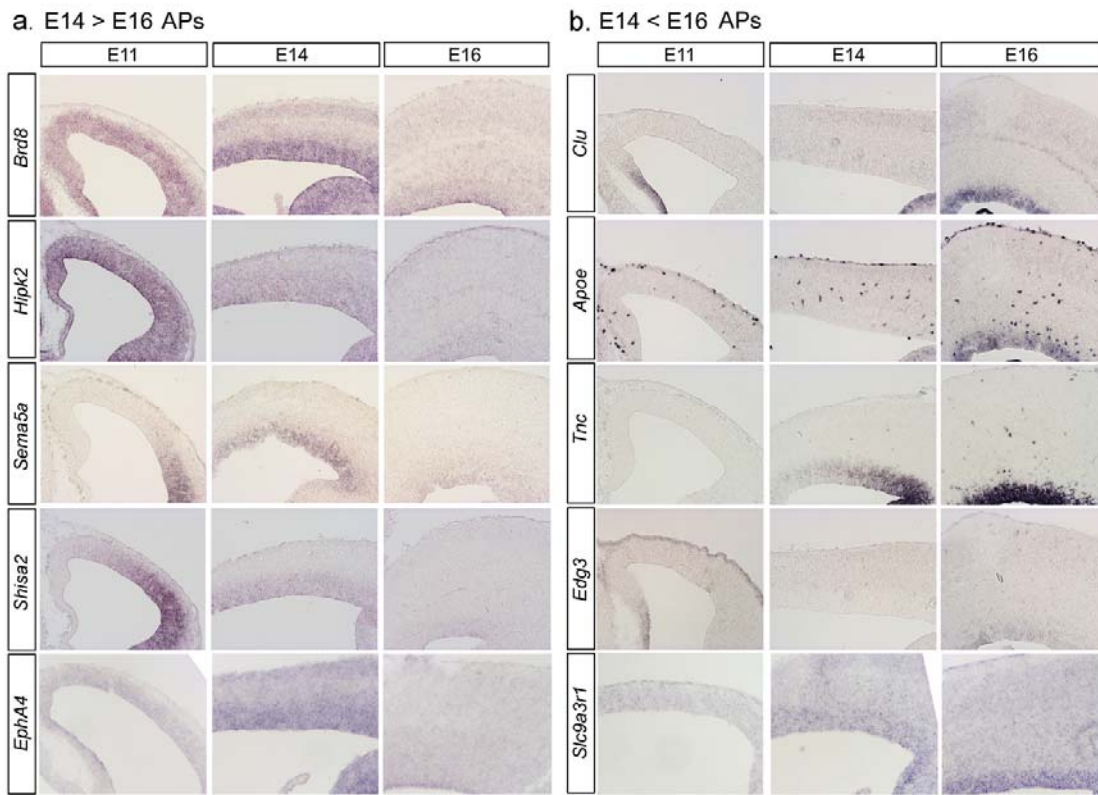

**Supplementary Figure 6. *In situ* expression of genes whose expression levels change between E14 and E16 in APs.** Temporal changes in genes selected from single-cell gene-expression profiles of APs (Fig. 2a, Supplementary Data 1) were also observed by *in situ* hybridization of E11, E14, and E16 mouse cerebral wall. Results from E14 > E16 genes (**a**) and E14 < E16 genes (**b**) are shown. Bar, 100 $\mu$ m.

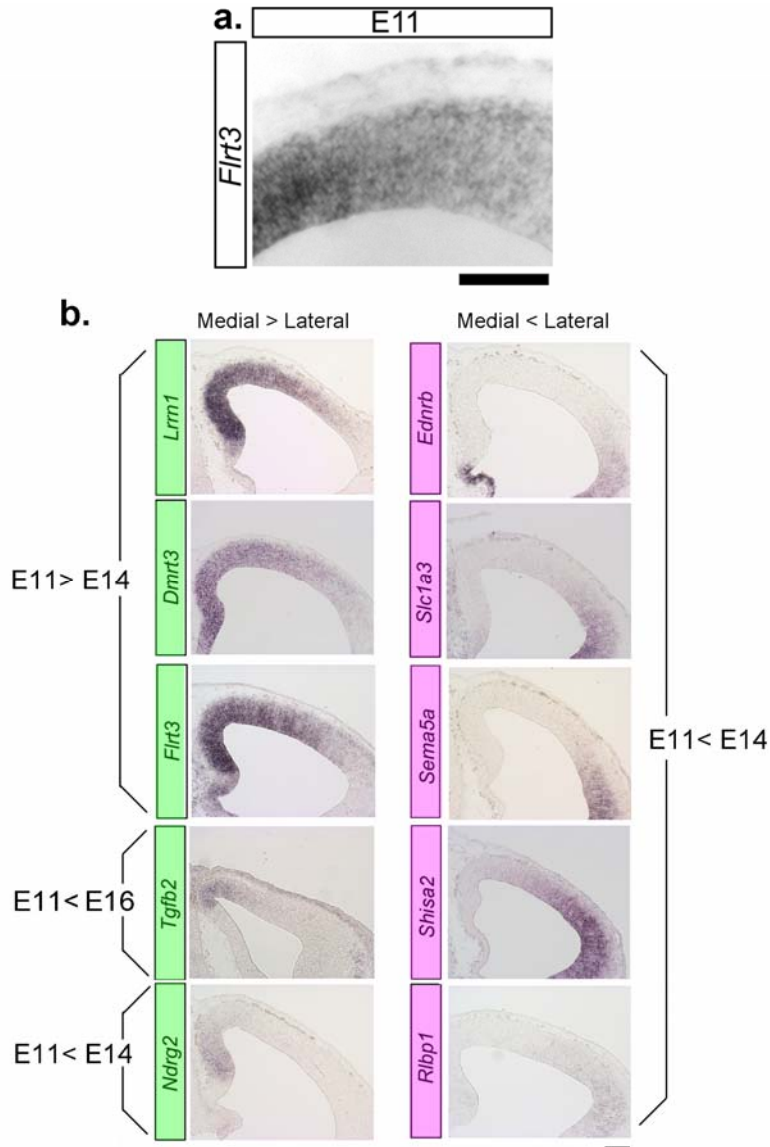

**Supplementary Figure 7. Mediolateral gradient of gene expression.**

(a) In situ expression of *Flrt3* revealed cell-to-cell variations of its expression level in a mediolateral gradient.

(b) Examples of genes that exhibit a ‘medial > lateral’ gradient pattern (green) or ‘medial < lateral’ gradient pattern (magenta). The ‘medial > lateral’ genes exhibited an ‘E11 > E14’ trend, and the ‘medial < lateral’ genes exhibited an ‘E11 < E14’ trend, consistently with previous reports showing that cortical neurogenesis proceeds in the lateral to medial direction<sup>4,5</sup>. Bar, 100µm.

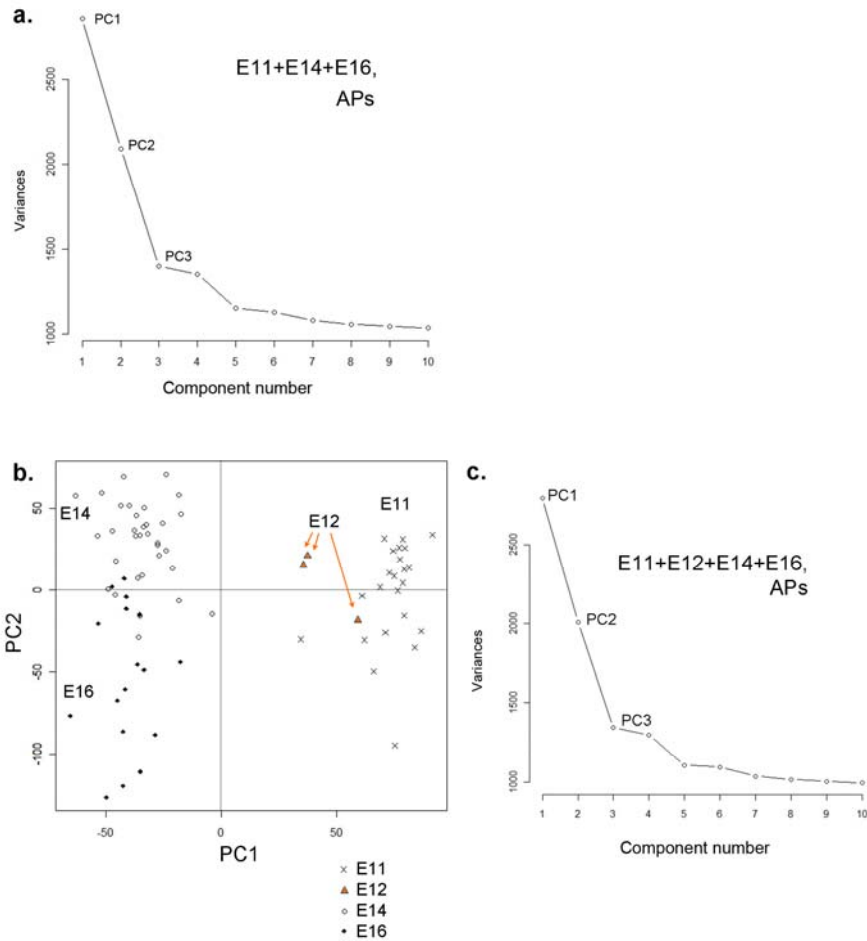

**Supplementary Figure 8. PCA on AP samples derived from different developmental stages.**

(a) Scree plot of PCA for all APs of E11, E14 and E16 in Fig2c.

(b) E12 APs show the intermediate state between E11 and E14 APs in their global gene expression pattern. PCA was performed on E12 AP samples together with E11, E14, and E16 AP samples, using all available probe set data (17192 probe sets; E11, N = 26; E12, N = 3; E14, N = 56; E16, N = 27). Each symbol indicates one cell.

(c) Scree plot of (b). Proportion of variances: 0.0430 for PC1 and 0.0309 for PC2.

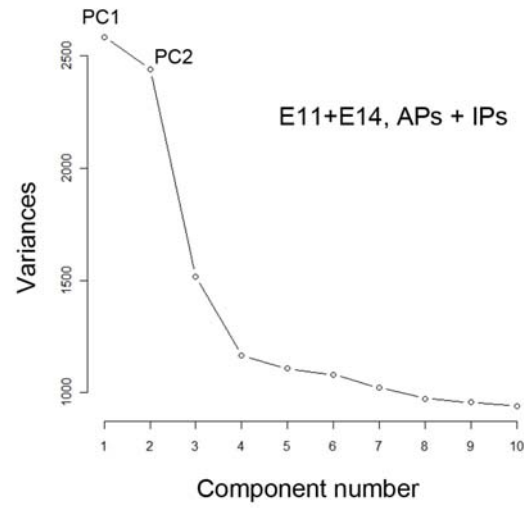

**Supplementary Figure 9. Scree plot of PCA for all progenitors of E11 and E14 in Fig3a.**

There is a 'break' between PC2 and PC3 that separates those with relatively large variances and those with small variances. At a minimum, this suggests that PC1 and PC2 are meaningful. Proportion of variances: 0.0394 for PC1, 0.0372 for PC2.

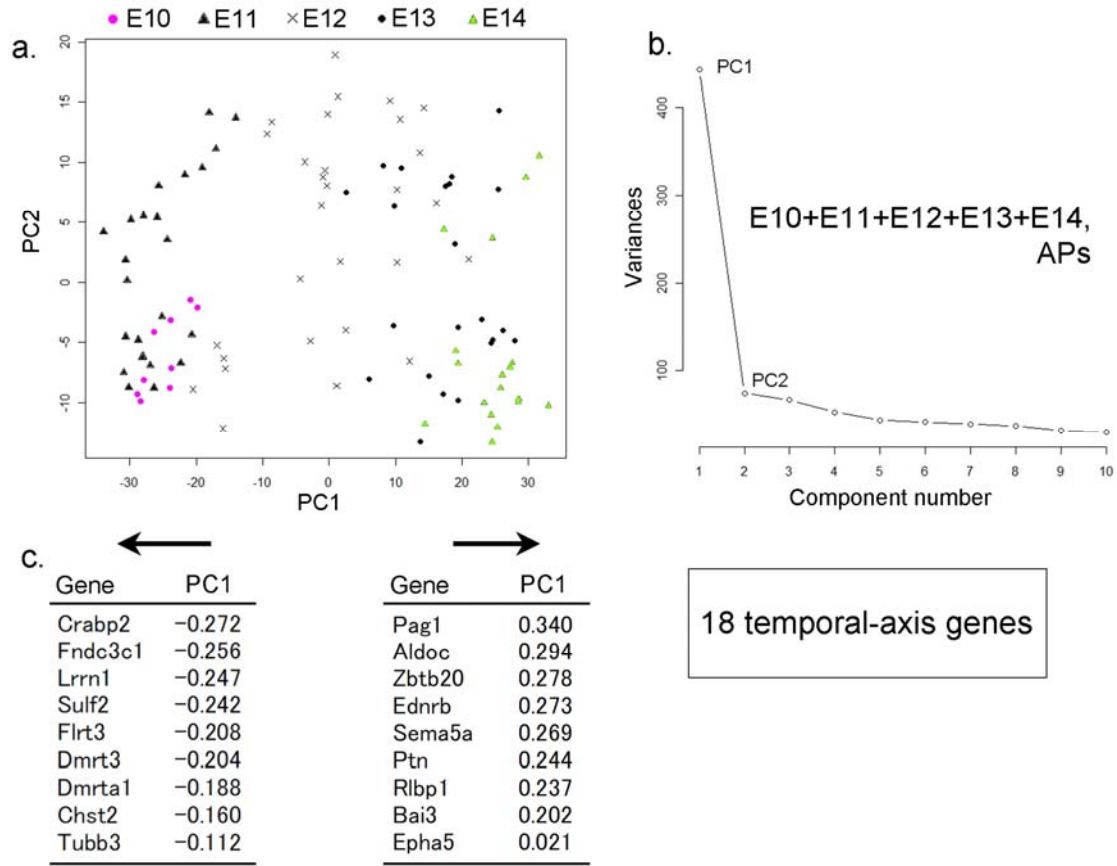

**Supplementary Figure 10. Expression levels of ‘18 temporal-axis genes’ represent temporal change of APs. Related to Figure 4a, e.**

**(a-c)** PCA was performed on the expression values of the ‘top18 temporal-axis genes’ (9 for the positive direction and 9 for the negative direction) obtained by QPCR for all APs (E10–E14, N = 102, Fig. 4a).

**(b)** Scree plot of (a). There is a big ‘break’ between PC1 and PC2 variances, validating that the PC1 largely represents the variations in the expression level of the ‘top 18 temporal-axis genes’ among APs during E10 and E14. Therefore, the PC1 score of each AP works as a good indicator of its temporal status in Fig. 4e. Proportion of variance: 0.409 (PC1).

**(c)** Contribution of the ‘top 18 temporal-axis genes’ to PC1.

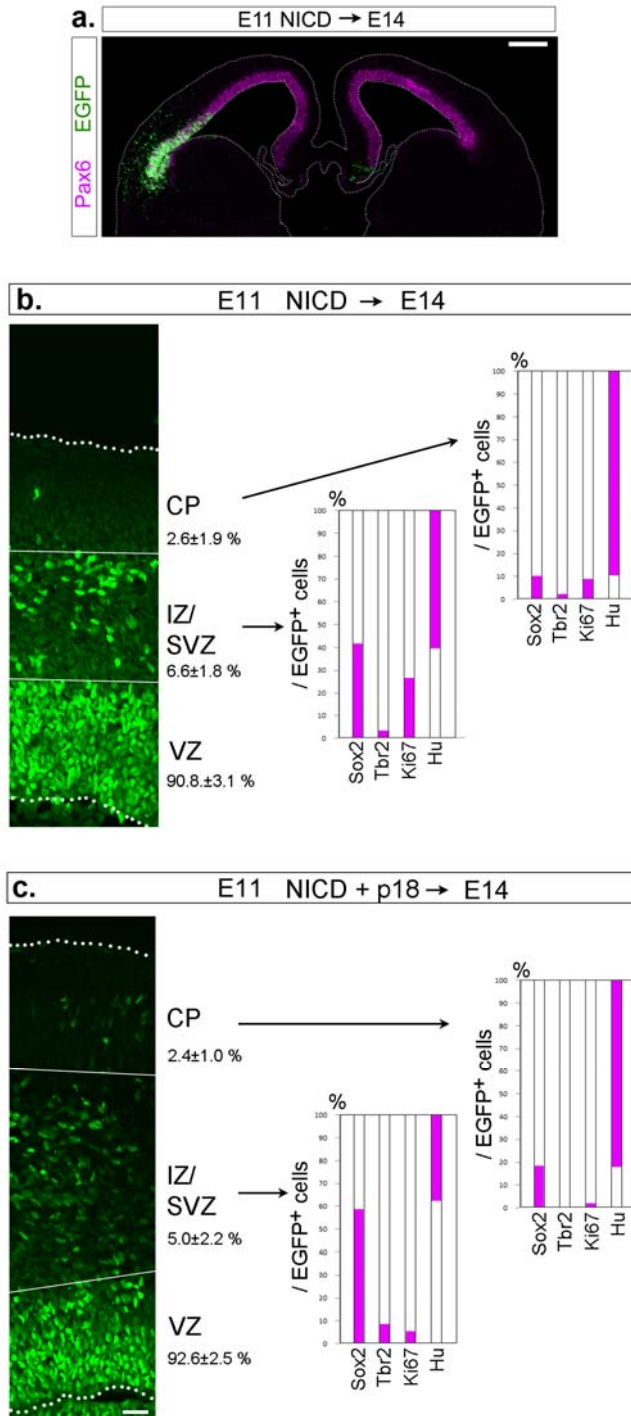

**Supplementary Figure 11. Characterization of cells overexpressing NICD or NICD/p18, which migrated out of the VZ. Related to Figure 5.**

(a) NICD overexpression reduced the thickness of the cerebral wall, and expanded the apical surface in the tangential direction. NICD was overexpressed with EGFP. Bar, 300 $\mu$ m.

(b) NICD was electroporated with EGFP at E11. After 3 days, most EGFP<sup>+</sup> cells remained in the VZ (90.8  $\pm$  3.1%, mean  $\pm$  s.d., N = 8), whereas a small population of EGFP<sup>+</sup> cells existed in the IZ/SVZ (6.6  $\pm$  1.8%), and CP (2.6  $\pm$  1.9%). Approximately 60% of the EGFP<sup>+</sup> cells in the IZ/SVZ and 90% of those in the CP were Hu<sup>+</sup>/Ki67<sup>-</sup>, suggesting that these

cells were neurons that lacked a sufficient level of NICD expression to inhibit their differentiation. The other 30% of EGFP<sup>+</sup> cells in the IZ/SVZ were Sox2<sup>+</sup>/Tbr2<sup>-</sup>/Ki67<sup>+</sup>, suggesting that these cells were undifferentiated progenitor cells, in which NICD expression occurred too late to inhibit their migration from the VZ.

(c) NICD and p18 were electroporated with EGFP at E11. After 3 days, most EGFP<sup>+</sup> cells existed in the VZ ( $92.6 \pm 2.5\%$ , mean  $\pm$  s.d., N = 8), whereas small population of EGFP<sup>+</sup> cells also existed in the IZ/SVZ ( $5.0 \pm 2.2\%$ ), and CP ( $2.4 \pm 1.0\%$ ). Approximately 40% of the EGFP<sup>+</sup> cells in the IZ/SVZ and 80% of those in the CP were Hu<sup>+</sup>/Ki67<sup>-</sup>, suggesting that these cells were neurons that lacked a sufficient level of NICD expression to inhibit their differentiation. The remaining approximately 55% of EGFP<sup>+</sup> cells in the IZ/SVZ and 20% in the CP were Sox2<sup>+</sup>/Tbr2<sup>-</sup>/Ki67<sup>-</sup>, suggesting that these cells were cell cycle-arrested, undifferentiated progenitor cells, in which NICD expression occurred too late to inhibit their migration from the VZ. Bar, 20 $\mu$ m.

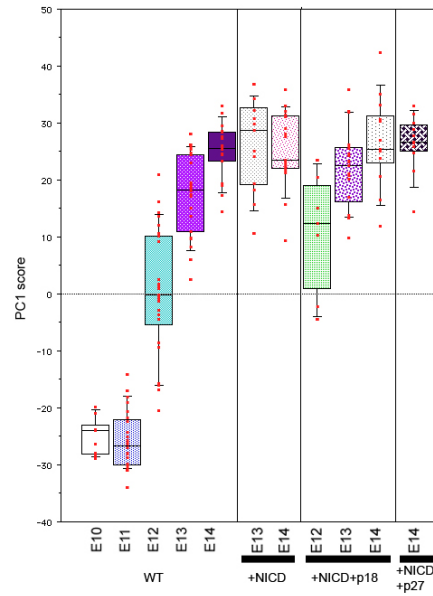

**Supplementary Figure 12. Expression of the 18 temporal-axis genes in APs that co-expressed NICD and p27.**

NICD and p27 (Cdkn1b) were co-overexpressed at E11 by *in vivo* electroporation, and single cell cDNAs were generated at E14. Expression levels of the 18 temporal-axis genes in APs (N=11) were examined by QPCR. The PC1 score of each cell was calculated as in Figure 4, and compared with those of WT cells and the cells expressing NICD/P18 (the same data in Fig. 4).



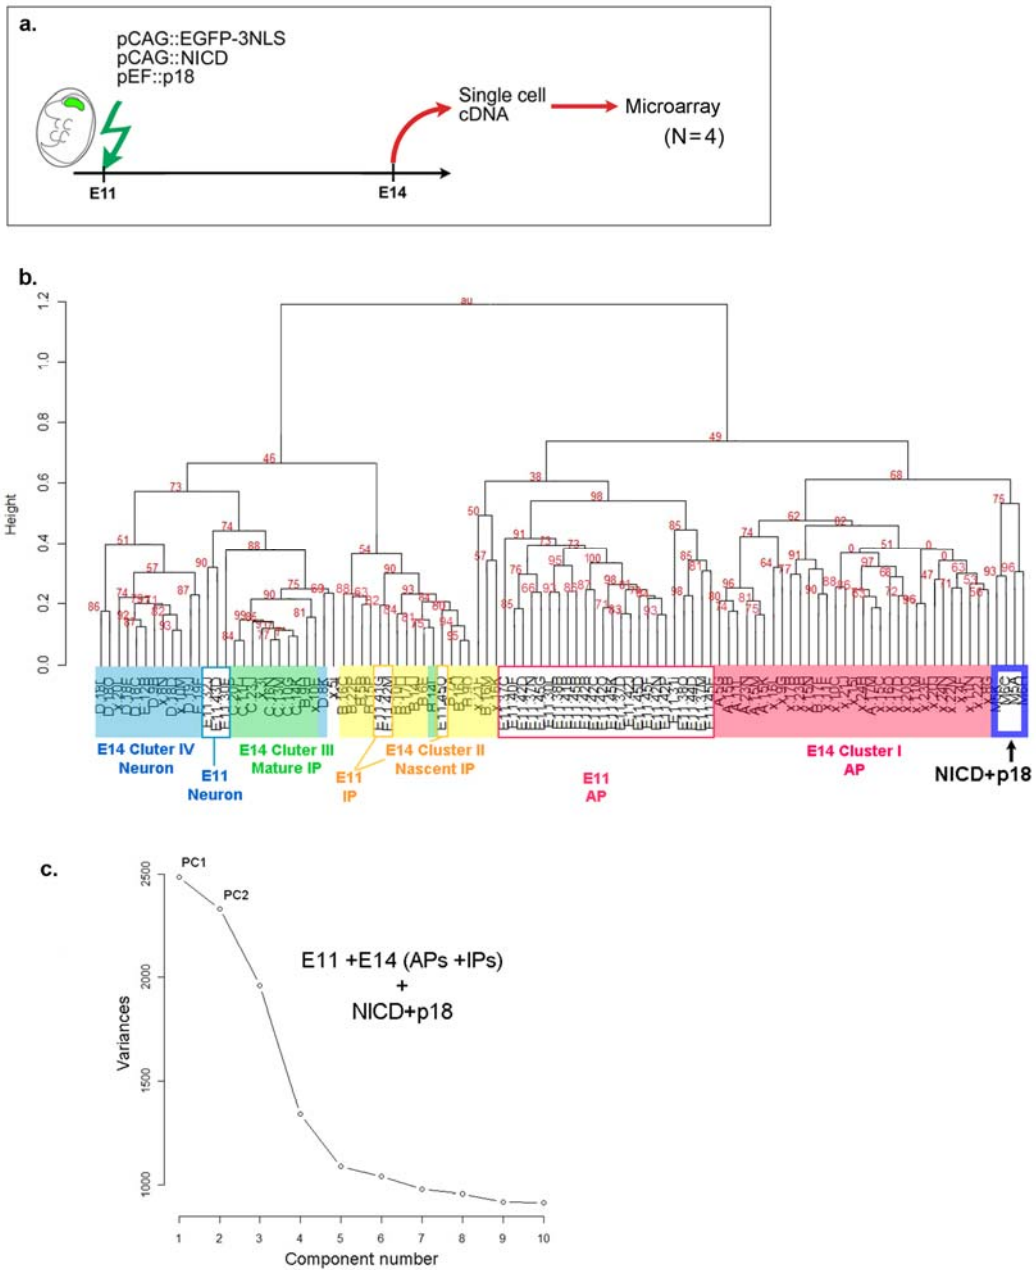

**Supplementary Figure 13. Microarray analysis on single cell cDNAs of NICD/p18 co-expressing cells.**

(a) Experimental design. pCAG::NICD and pEF::p18 (with pCAG::EGFP-3NLS) were electroporated into the E11 cerebral wall *in vivo*, and at E14, single cell cDNAs of EGFP<sup>+</sup> cells were generated and analyzed by microarrays (N = 4 cells).

(b) E14-based hierarchical clustering analysis of single cell cDNAs using the SigABC genes. The values in red at the branches are AU *p*-values (%). In this dendrogram, NICD/p18 co-expressing cells locate in the cluster (blue square) next to that of E14 APs (red).

(c) Scree plot of Fig. 4i PCA. Proportion of variances: 0.0376 for PC1, and 0.0352 for PC2.

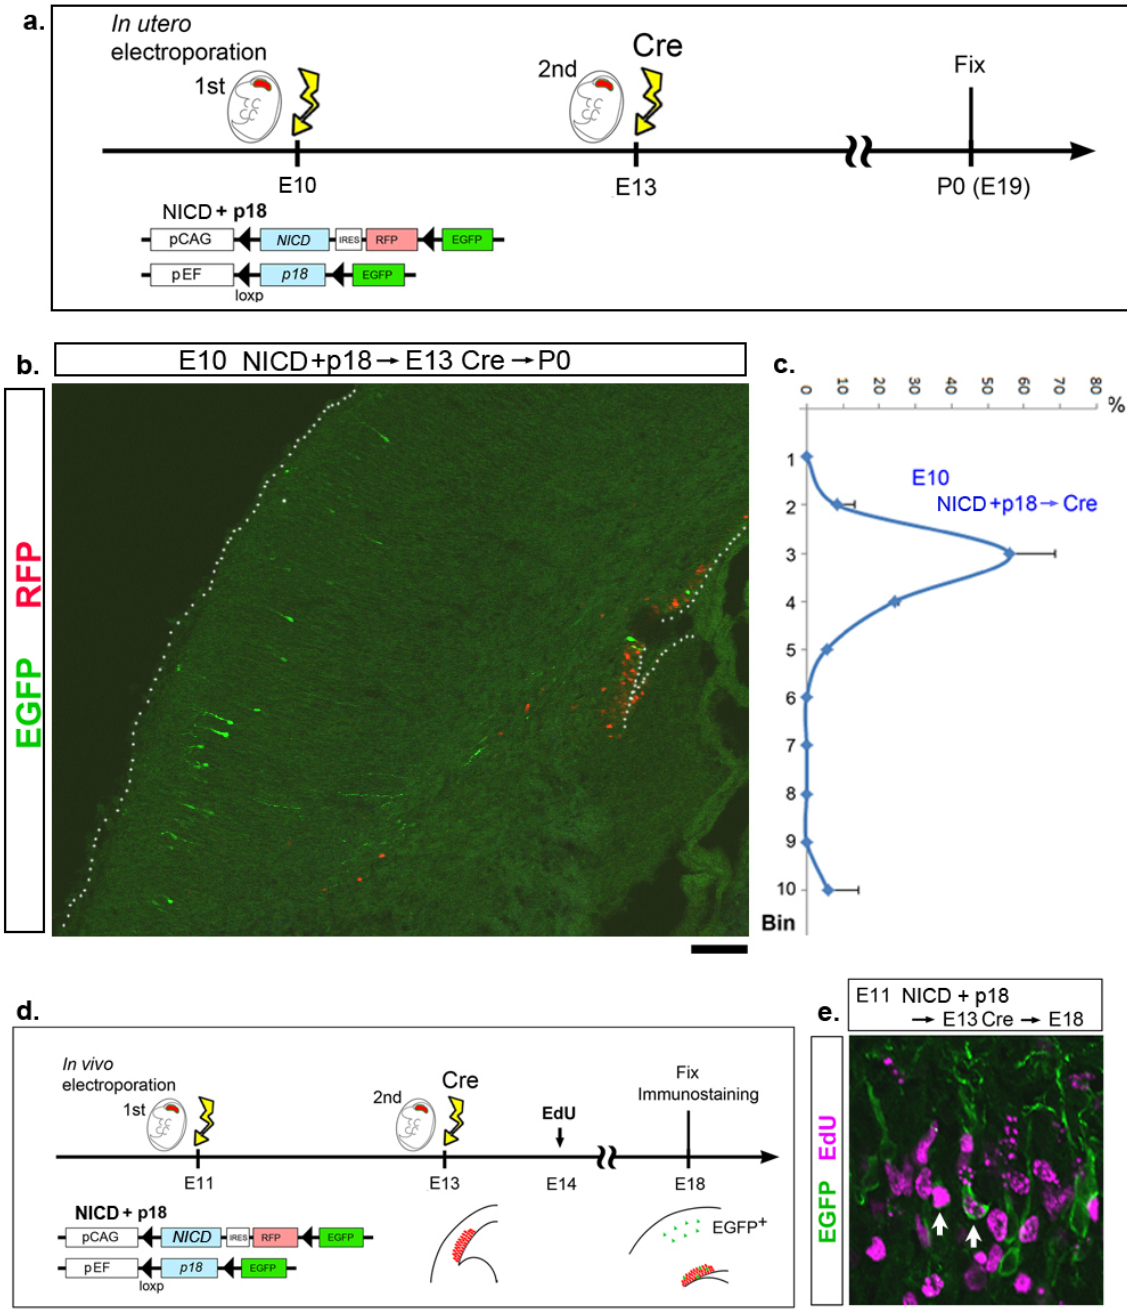

**Supplementary Figure 14. Laminar fate of progenitor cells was not altered by transient cell-cycle arrest.**

(a) Experimental design of double *in vivo* electroporation study. Experiments were similar to those shown in Fig. 6, but the initial electroporation was performed at E10.

(b) P0 brain section from E10 NICD/p18 and E13 Cre double-electroporated mouse. EGFP<sup>+</sup> cells that had undergone recombination to halt NICD/p18 expression were present in the CP, whereas RFP<sup>+</sup> (thus NICD<sup>+</sup>/p18<sup>+</sup>) cells were still confined to the ventricular zone. Bar, 100 μm.

(c) Distribution of EGFP<sup>+</sup> cells in the CP. CP was separated into 10 bins. Bin 1 represents the most exterior portion of the CP.

(d) Experimental design of (e).

(e) E18 brain section from E11 NICD/p18 and E13 Cre double-electroporated mouse, showing some EGFP<sup>+</sup> cells (arrows) were EdU<sup>+</sup> after labeling at E14. %EdU<sup>+</sup> in EGFP<sup>+</sup> CP cells =  $15.1 \pm 1.9$  (mean  $\pm$  s.d., N = 4 embryos; > 100 EGFP<sup>+</sup> cells/embryo were examined). Bar, 30  $\mu$ m.

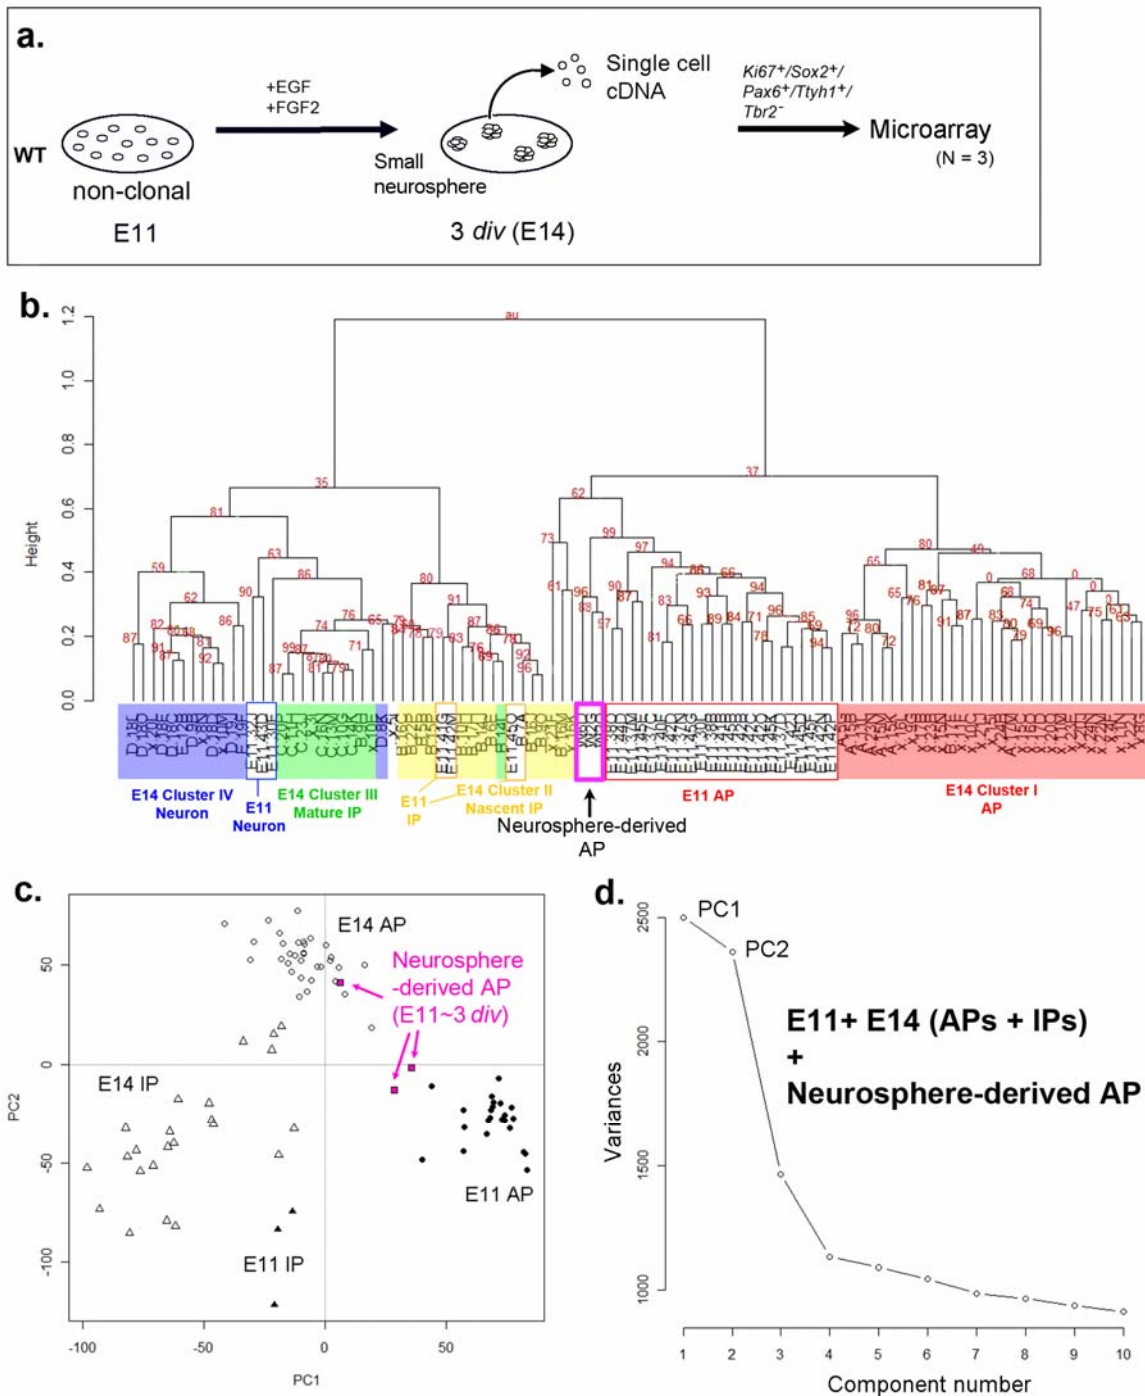

**Supplementary Figure 15. Microarray analysis of single cell cDNAs from neurospheres. Related to Fig 7.**

(a) Experimental design. E11 cerebral cells were cultured with EGF and FGF2 on suspension culture dishes. After 3 days, small neurospheres were formed, and single cell cDNAs were generated from the cells in the neurospheres. Then, single cell cDNAs from APs were selected by QPCR as  $Ki67^+/Sox2^+/Pax6^+/Ttyh1^+/Tbr2^-$ , and analyzed by microarray (N = 3 cells).

(b) E14-based hierarchical clustering analysis of single cell cDNAs using the SigABC genes. The values in red at the branches are AU  $p$ -values (%). In this dendrogram, the neurosphere-derived APs (magenta square) locate in the AP cluster.

(c) PCA was performed using the microarray data from single-cell cDNAs from the neurosphere-derived APs (N = 3, red arrowed) and E11 and E14 progenitor cells (APs+IPs, N = 79; 17192 probe sets). Each symbol represents one cell. The plots for the neurosphere-derived APs distributed sparsely between E11 APs and E14 APs, suggesting that the temporal change in global gene expression is more various in the neurosphere-derived APs than those *in vivo*.

(d) Scree plot of (c). Proportion of variances: 0.0383 for PC1, 0.0362 for PC2.

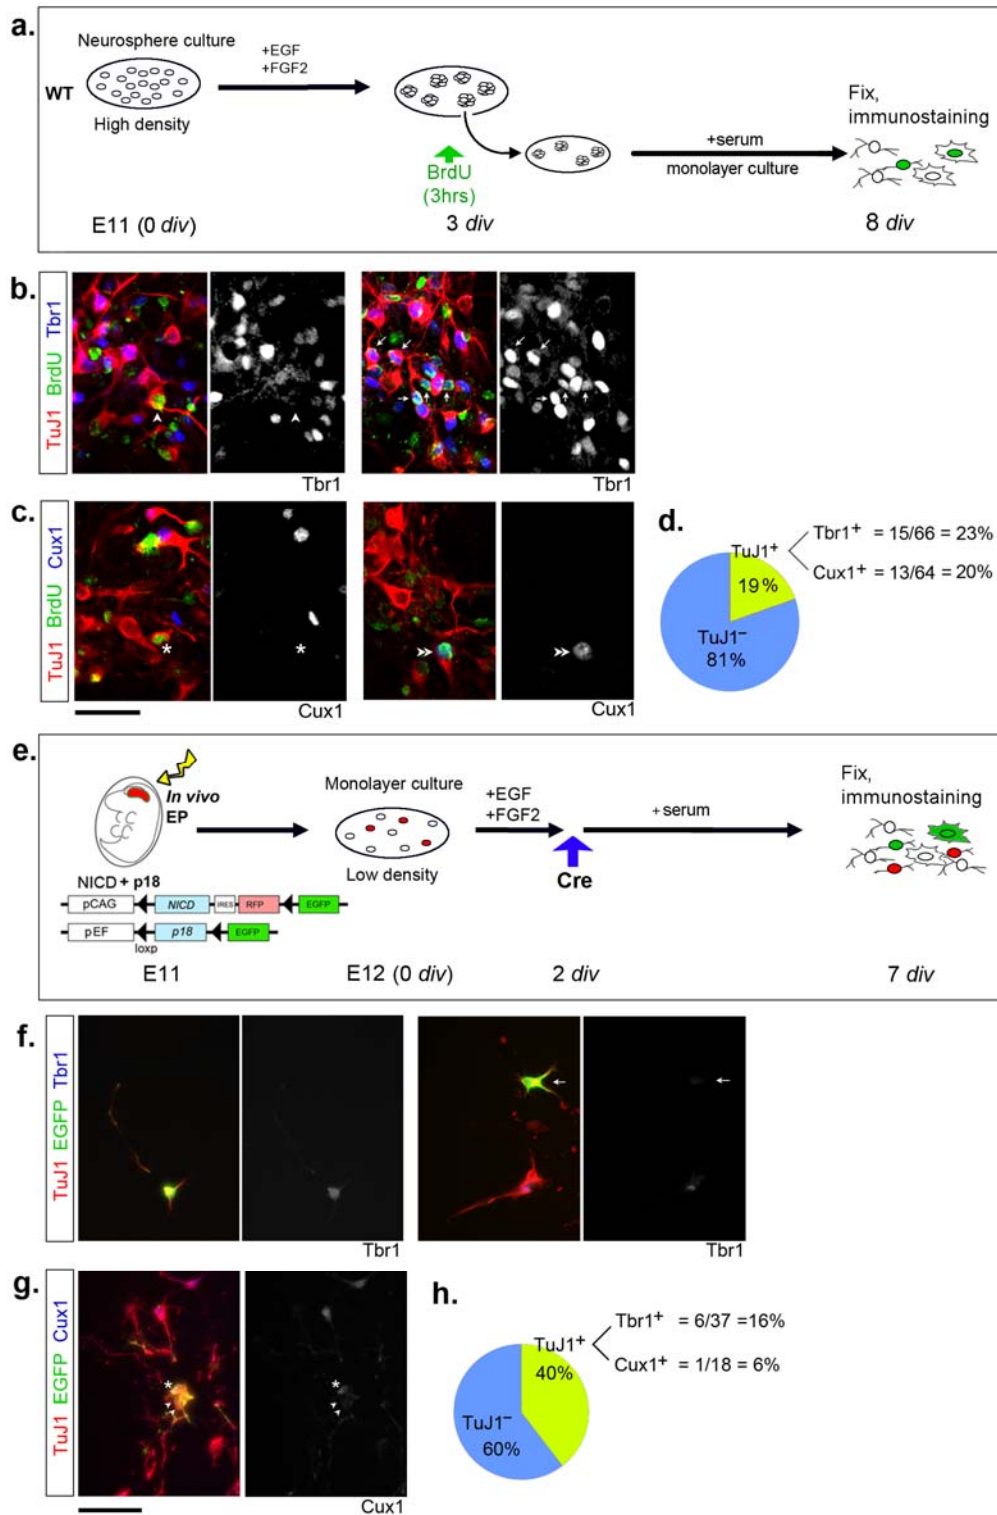

**Supplementary Figure 16. *In vitro* differentiation of neurospheres and transient cell-cycle arrested cells. Related to Figure 7.**

(a) Experimental design of neurosphere differentiation assay (b–d). Small neurospheres (Supplementary Figure 16) were allowed to differentiate for further 5 days with serum on PEI-coated dishes. To label the progenitor cells, BrdU was added into the medium for 3 hrs on the first differentiating day.

**(b, c)** Triple immunostaining of the differentiation culture at 8 *div* with TuJ1 (anti-Tubb3), anti-BrdU and anti-Tbr1 (b) or anti-Cux1 (c). Examples of Tbr1<sup>-</sup> cell (arrowhead), Tbr1<sup>+</sup> cells (arrows), Cux1<sup>-</sup> cell (asterisk) and Cux1<sup>+</sup> cells (double-arrowheads) in BrdU<sup>+</sup> /TuJ1<sup>+</sup> cells were shown. Bar, 30μm.

**(d)** Frequency of immunoreactive cells in the BrdU<sup>+</sup> cells at 8 *div* (N = 683), suggesting that APs in neurospheres do not precisely reproduce the *in vivo* temporal progression of the AP character (Figure 6).

**(e)** Experimental design of *in vitro* differentiation of transiently cell-cycle arrested cells. At E11, *in vivo* electroporation was performed to express NICD/p18. After 1 day, the cerebral cells were harvested and cultured in monolayer at a low density ( $3\sim 6 \times 10^3$  cells/ml) with EGF and FGF2. After 2 *div*, adenovirus (Adex-CAG-NL-Cre) was infected to express Cre. Cells were fixed at 7 *div*, and examined by immunocytochemistry (f, g).

**(f)** Tbr1<sup>+</sup> (left) and Tbr2<sup>-</sup> (arrow) EGFP<sup>+</sup> cells.

**(g)** Cux1<sup>+</sup> (asterisk) and Cux1<sup>-</sup> (arrowheads) EGFP<sup>+</sup> cells. Bar, 50μm.

**(h)** Frequency of immunoreactive cells in EGFP<sup>+</sup> cells (N = 139). The rate of Cux1<sup>+</sup> neuron production was quite low compared with that observed in the *in vivo* experiments (Figure 6h).

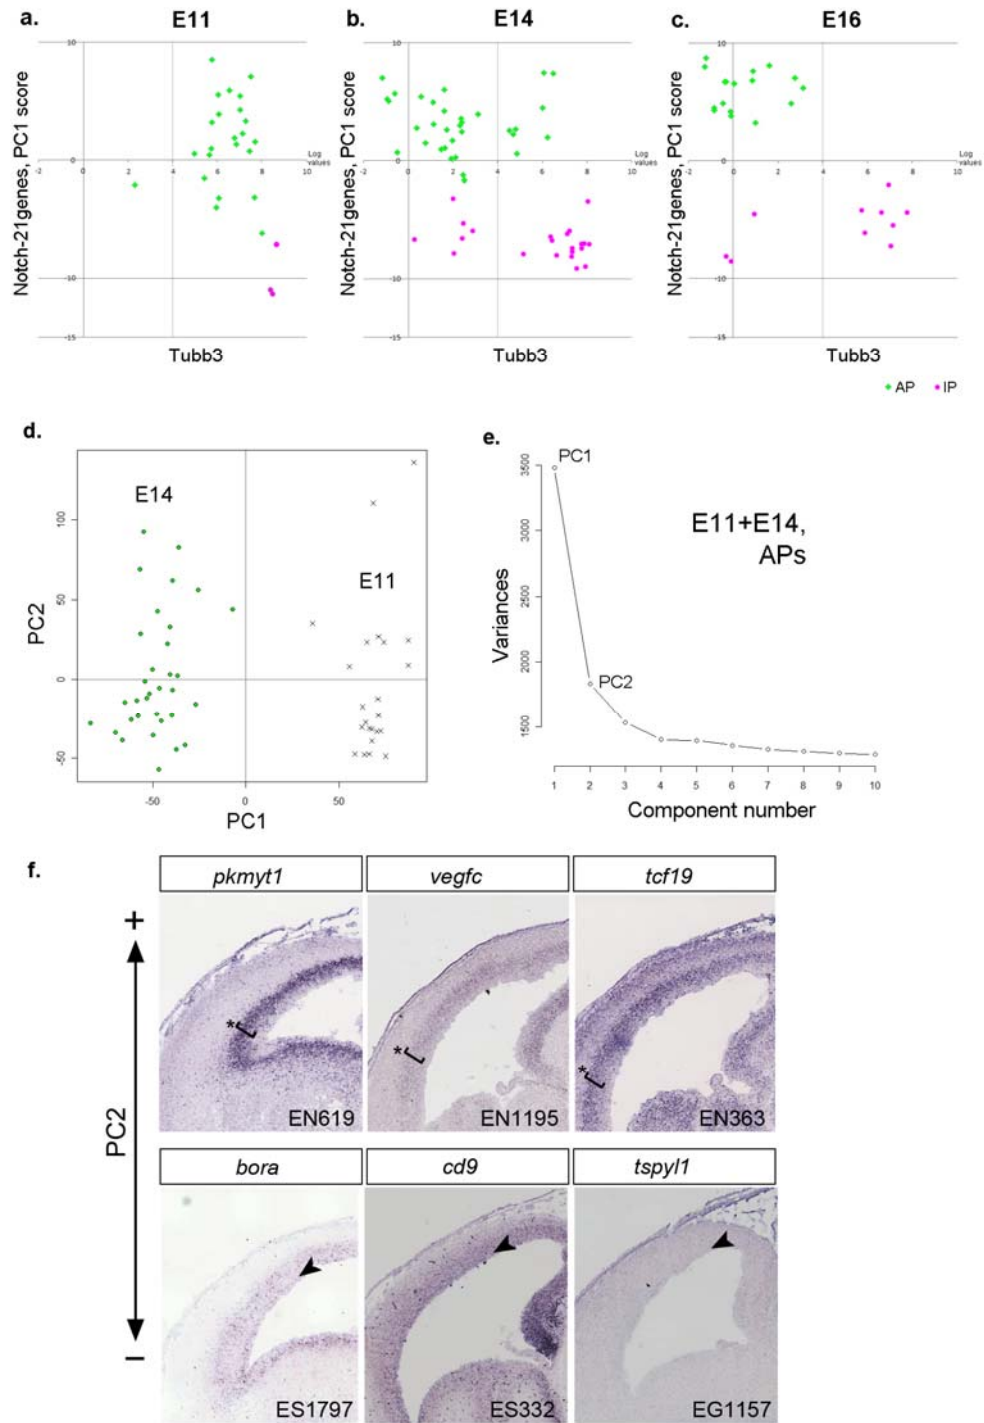

**Supplementary Figure 17. Gene expression variation in APs population.**

(a-c) *Tubb3* expression levels do not represent ‘Notch signaling status’ among E11 APs. Scattered plot showing *Tubb3* expression levels (probe set ID: 1415978\_at) and the PC1 score of PCA on the 21-Notch signaling related genes (Supplementary Fig. 4). Each dot represents one progenitor cell. Almost all E11 APs express *Tubb3* at a moderate level, although not as highly as in neurons. This is the characteristic feature of E11 APs, not of E14 and E16 APs. We did not find any particular subclasses among E11 APs, even after comparing *Tubb3*-high APs with *Tubb3*-low APs. This was also



the case for the comparison between APs showing a high Notch-PC1 score and those with a low Notch-PC1 score (not shown).

**(d)** The score plot of PCA on E11 and E14 APs shows heterogeneity in global gene expression both in the E11 and E14 AP populations. One symbol indicates one cell. PC1 is most likely to represent the temporal transition of APs. Proportion of variances: 0.0547 for PC1 and 0.0288 for PC2.

**(e)** Scree plot of (d).

**(f)** Expression pattern of the genes that highly contribute to PC2 (d) positively (*pkmyt1*, *vegfc*, *pcf19*) or negatively (*bora*, *cd9*, *tspyl1*) in the E14 telencephalon. PC2-positive genes peak at the basal half of the VZ (asterisk) and PC2-negative genes peak near the ventricular surface (arrowheads). This complementary expression pattern in the VZ was also seen in the genes that highly contribute to PC3 positively or negatively. These results, together with functional annotation clustering of top 40 probe sets contributing PC2 or PC3, suggested that PC2 and PC3 represent the cell cycle phase of the cells. Data from GenePaint database (<http://www.genepaint.org>): set ID are indicated at the bottom of the panels.

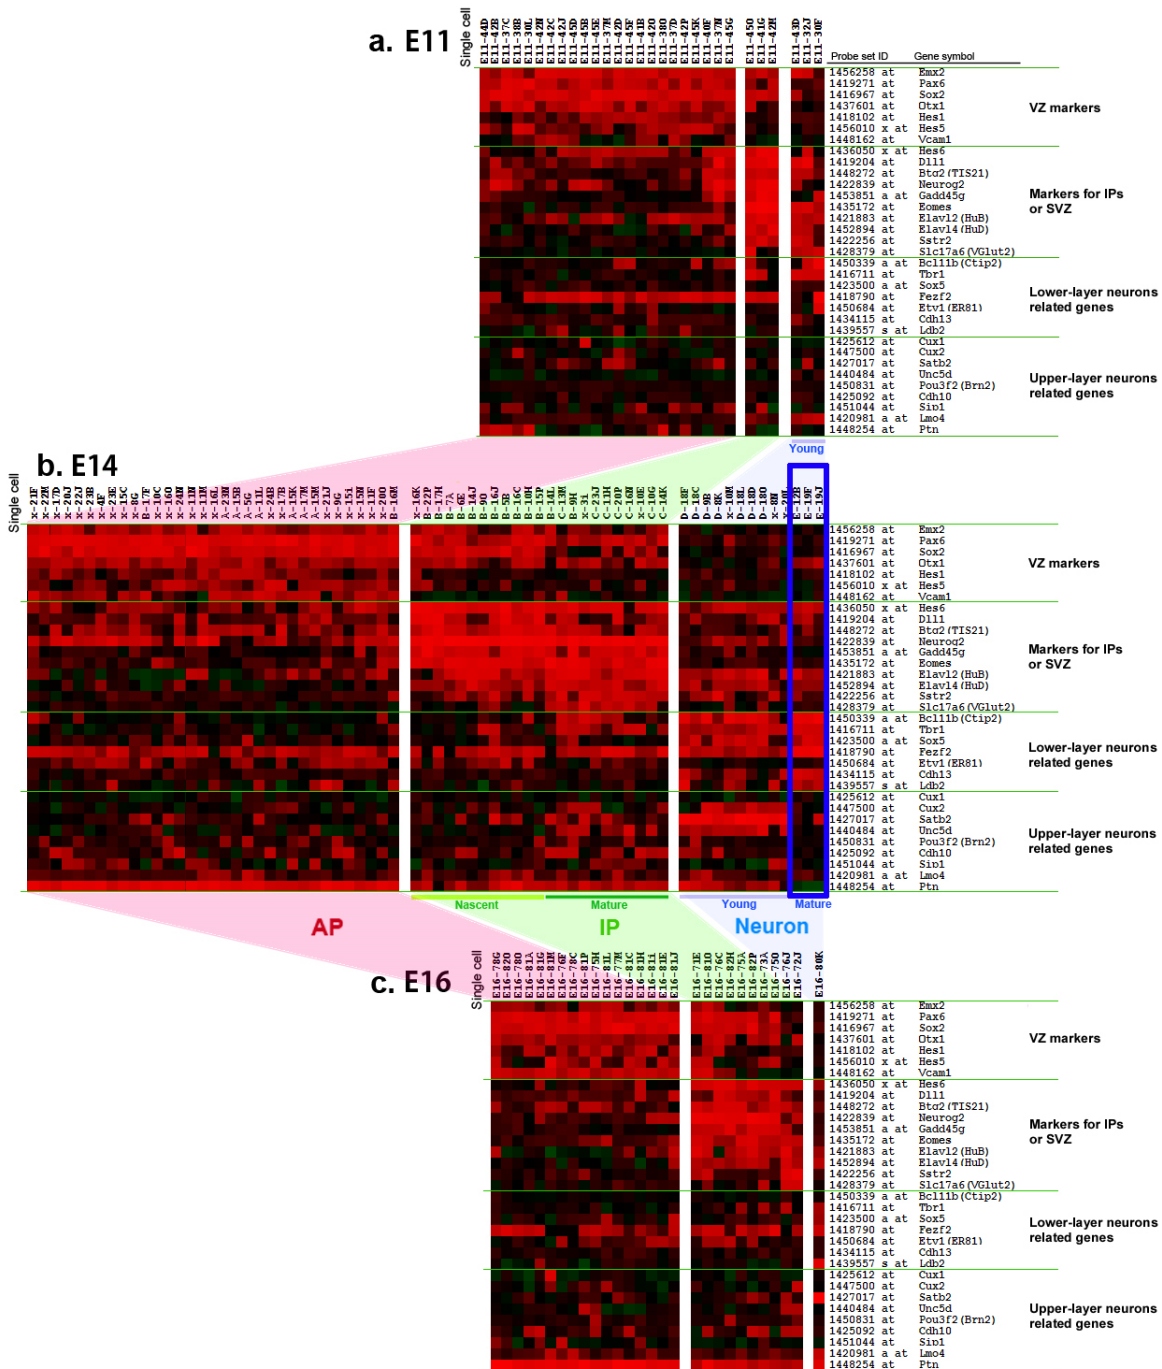

**Supplementary Figure 18. Expression of layer-marker genes in single-cell cDNAs**

Summary of expression levels of progenitor and neuronal layer-marker genes in single cell cDNAs at E11 (a), E14 (b) and E16 (c). Each column indicates one cell, and each row indicates one probe set on the microarray. The expression levels are color-coded from red (high) to green (low). At E14, all young neurons co-express both lower-layer and upper-layer marker genes, whereas mature neurons (single-cell cDNAs generated from the cortical plate fragment) specifically express lower-layer markers.

**Supplementary Table 1. Marker gene expression in cDNAs from single cerebral cells, determined by QPCR.**

| Cell type                                                       | E11<br><i>N</i> ( <i>N</i> for GeneChip) | E14      | E16     |
|-----------------------------------------------------------------|------------------------------------------|----------|---------|
| Hes1 <sup>+</sup> or Hes5 <sup>+</sup> progenitor cell          |                                          |          |         |
| Ngn2 <sup>-</sup> /Tbr2 <sup>-</sup>                            | 40 (13)*                                 | 20 (18)  | 21 (14) |
| Ngn2 <sup>+</sup> /Tbr2 <sup>-</sup>                            | 20 (11)                                  | 15 (12)  | 5 (1)   |
| Ngn2 <sup>-</sup> /Tbr2 <sup>+</sup>                            | 1                                        | 4 (4)    | 1 (1)   |
| Ngn2 <sup>+</sup> /Tbr2 <sup>+</sup>                            | 4 (2)                                    | 13 (13)  | 13 (6)  |
| Hes1 <sup>-</sup> /Hes5 <sup>-</sup> progenitor cell            |                                          |          |         |
| Ngn2 <sup>-</sup> /Tbr2 <sup>-</sup>                            | 3                                        | 1        | 3 (1)   |
| Ngn2 <sup>+</sup> /Tbr2 <sup>-</sup>                            | 1                                        | 1 (1)    | 1       |
| Ngn2 <sup>+</sup> /Tbr2 <sup>+</sup>                            | 2 (1)                                    | 13 (9)   | 4 (2)   |
| Ki67 <sup>+</sup> /CyclinE1 <sup>-</sup> cell (putative neuron) | 4 (3)                                    | 25 (10)  | 14 (3)  |
| CP neuron                                                       |                                          | 9 (3)    |         |
| Other                                                           |                                          | 1 (1)    |         |
| Total                                                           | 75 (30)*                                 | 102 (70) | 62 (28) |

\*This includes one sample, E11-31i, which is excluded from the analysis except for Fig1 because of its low quality.

CP, cortical plate

**Supplementary Table 2.**  
**Functional annotation clustering of top 150 'PC1 genes' of Fig. 2c**

**a) E11 AP > E14+E16 AP**

| Category             | Term                                                 | P-Value                | Example of PC1 genes                                                                                                                                                                      |
|----------------------|------------------------------------------------------|------------------------|-------------------------------------------------------------------------------------------------------------------------------------------------------------------------------------------|
| Annotation Cluster 1 | Enrichment Score: 3.07                               |                        |                                                                                                                                                                                           |
| GOTERM_CC_FAT        | GO:0005730~nucleolus                                 | 1.91x10 <sup>-5</sup>  | Tsr1, Pno1, Pop5, Dkc1, Ddx54, Wdr3, Wdr12, Cirh1a, Wdr43, Ppan, Nhp2                                                                                                                     |
| GOTERM_BP_FAT        | GO:0022613~ribonucleoprotein complex biogenesis      | 7.10 x10 <sup>-5</sup> |                                                                                                                                                                                           |
| GOTERM_BP_FAT        | GO:0042254~ribosome biogenesis                       | 1.84x10 <sup>-4</sup>  |                                                                                                                                                                                           |
| GOTERM_BP_FAT        | GO:0006364~rRNA processing                           | 2.20 x10 <sup>-4</sup> |                                                                                                                                                                                           |
| GOTERM_BP_FAT        | GO:0016072~rRNA metabolic process                    | 2.35 x10 <sup>-4</sup> |                                                                                                                                                                                           |
| GOTERM_BP_FAT        | GO:0034470~ncRNA processing                          | 1.15x10 <sup>-3</sup>  |                                                                                                                                                                                           |
| GOTERM_BP_FAT        | GO:0034660~ncRNA metabolic process                   | 1.15x10 <sup>-3</sup>  |                                                                                                                                                                                           |
| GOTERM_CC_FAT        | GO:0005732~small nucleolar ribonucleoprotein complex | 4.25 x10 <sup>-3</sup> |                                                                                                                                                                                           |
| GOTERM_BP_FAT        | GO:0006396~RNA processing                            | 5.20 x10 <sup>-3</sup> |                                                                                                                                                                                           |
| Annotation Cluster2  | Enrichment Score: 2.92                               |                        |                                                                                                                                                                                           |
| GOTERM_CC_FAT        | GO:0005730~nucleolus                                 | 1.91 x10 <sup>-5</sup> | Tsr, E2f3, Dkc, Ddx54, Wdr3, Wdr43, Wdr12, Matr3, Nhp2, Pbx2, Pno1, Dach1, Pop5, Aldoa, Ccnd1, Cirh1a, Bnip3, Ppan                                                                        |
| GOTERM_CC_FAT        | GO:0031981~nuclear lumen                             | 7.66 x10 <sup>-5</sup> |                                                                                                                                                                                           |
| GOTERM_CC_FAT        | GO:0043233~organelle lumen                           | 4.46 x10 <sup>-4</sup> |                                                                                                                                                                                           |
| GOTERM_CC_FAT        | GO:0031974~membrane-enclosed lumen                   | 6.52 x10 <sup>-4</sup> |                                                                                                                                                                                           |
| GOTERM_CC_FAT        | GO:0070013~intracellular organelle lumen             | 1.26 x10 <sup>-3</sup> |                                                                                                                                                                                           |
| Annotation Cluster 3 | Enrichment Score: 1.87                               |                        |                                                                                                                                                                                           |
| KEGG_PATHWAY         | mmu05212:Pancreatic cancer                           | 1.78 x10 <sup>-3</sup> | Msh6, Ccne, E2f3, Cdc42, Cblb, Ikbkb, Ccnd1, Vegfc                                                                                                                                        |
| KEGG_PATHWAY         | mmu05200:Pathways in cancer                          | 8.23 x10 <sup>-3</sup> |                                                                                                                                                                                           |
| Annotation Cluster 4 | Enrichment Score: 1.34                               |                        |                                                                                                                                                                                           |
| BIOCARTA             | m_cellcyclePathway:Cyclins and Cell Cycle Regulation | 1.22 x10 <sup>-2</sup> | Rhob, Cdt1, Ccne1, Cdc42, Ccnd1, Ccnd3                                                                                                                                                    |
| KEGG_PATHWAY         | mmu04110:Cell cycle                                  | 1.37 x10 <sup>-2</sup> |                                                                                                                                                                                           |
| GOTERM_BP_FAT        | GO:0051726~regulation of cell cycle                  | 2.17 x10 <sup>-2</sup> |                                                                                                                                                                                           |
| Annotation Cluster 5 | Enrichment Score: 1.27                               |                        |                                                                                                                                                                                           |
| GOTERM_MF_FAT        | GO:0000166~nucleotide binding                        | 4.06 x10 <sup>-3</sup> | Galk1, Acvr2b, Mcm6, Igf2bp1, Stk39, Hisppd1, Gmps, Matr3, Dach1, Cdc42, Asns, Eif5, Psmc6, Nt5c, Ryk, Brsk2, Pabpc4, Ddx54, Pak3, Msh6, Rhob, Igf2bp2, Ikbkb, Tubb3, Hsp110, Myo5b, Ror2 |

**b) E11 AP < E14+E16 AP**

| Category             | Term                                                      | P-Value                | Example of PC1 genes                                                                                                                      |
|----------------------|-----------------------------------------------------------|------------------------|-------------------------------------------------------------------------------------------------------------------------------------------|
| Annotation Cluster 1 | Enrichment Score: 3.54                                    |                        |                                                                                                                                           |
| GOTERM_MF_FAT        | GO:0001871~pattern binding                                | 5.60 x10 <sup>-8</sup> | Ccnc80, Bcan, Ncan, Clu, Fstl1, Fstl5, Slc1a3, Thsd4, Ptn, Ptprz1, Tnc, Cyr61, Thbs1, Ptx3, Smpd3a, Bmper, Mfge8, Lipg, LOC100047936, Vit |
| GOTERM_MF_FAT        | GO:0030247~polysaccharide binding                         | 5.60x10 <sup>-8</sup>  |                                                                                                                                           |
| GOTERM_MF_FAT        | GO:0005539~glycosaminoglycan binding                      | 3.26x10 <sup>-7</sup>  |                                                                                                                                           |
| GOTERM_MF_FAT        | GO:0030246~carbohydrate binding                           | 9.60 x10 <sup>-5</sup> |                                                                                                                                           |
| GOTERM_MF_FAT        | GO:0008201~heparin binding                                | 1.24 x10 <sup>-4</sup> |                                                                                                                                           |
| GOTERM_CC_FAT        | GO:0005578~proteinaceous extracellular matrix             | 3.57 x10 <sup>-4</sup> |                                                                                                                                           |
| GOTERM_CC_FAT        | GO:0031012~extracellular matrix                           | 4.64 x10 <sup>-4</sup> |                                                                                                                                           |
| GOTERM_BP_FAT        | GO:0010811~positive regulation of cell-substrate adhesion | 6.20 x10 <sup>-4</sup> |                                                                                                                                           |
| GOTERM_CC_FAT        | GO:0044421~extracellular region part                      | 1.83 x10 <sup>-3</sup> |                                                                                                                                           |
| GOTERM_BP_FAT        | GO:0010810~regulation of cell-substrate adhesion          | 1.98 x10 <sup>-3</sup> |                                                                                                                                           |
| GOTERM_BP_FAT        | GO:0045785~positive regulation of cell adhesion           | 2.43 x10 <sup>-3</sup> |                                                                                                                                           |

|                      |                                                                  |                        |                                                                                |
|----------------------|------------------------------------------------------------------|------------------------|--------------------------------------------------------------------------------|
| GOTERM_CC_FAT        | GO:0005576~extracellular region                                  | 3.45 x10 <sup>-3</sup> |                                                                                |
| Annotation Cluster 2 |                                                                  | Enrichment Score: 2.70 |                                                                                |
| GOTERM_BP_FAT        | GO:0007155~cell adhesion                                         | 7.19 x10 <sup>-4</sup> | Tnc, Cyr61, Vcl, Thbs1, Bcan, Nrcam, Ncan, Vcam1, Pcdh10, Pcdh8, Mfge8, Sorbs1 |
| GOTERM_BP_FAT        | GO:0022610~biological adhesion                                   | 7.30 x10 <sup>-4</sup> |                                                                                |
| Annotation Cluster 3 |                                                                  | Enrichment Score: 1.50 |                                                                                |
| GOTERM_BP_FAT        | GO:0019226~transmission of nerve impulse                         | 2.90 x10 <sup>-3</sup> | Shc3, Hexb, Atp1a2, Ncan, Nrcam, Ctnnbp2, Pmp22                                |
| Annotation Cluster 4 |                                                                  | Enrichment Score: 1.37 |                                                                                |
| GOTERM_BP_FAT        | GO:0030030~cell projection organization                          | 1.48x10 <sup>-2</sup>  | Vcl, Ptprz, Wastf2, Epha4, Nrcam, Sema5a, Clu                                  |
| GOTERM_BP_FAT        | GO:0032989~cellular component morphogenesis                      | 2.26 x10 <sup>-2</sup> |                                                                                |
| GOTERM_BP_FAT        | GO:0048812~neuron projection morphogenesis                       | 2.45 x10 <sup>-2</sup> |                                                                                |
| GOTERM_BP_FAT        | GO:0048667~cell morphogenesis involved in neuron differentiation | 2.72 x10 <sup>-2</sup> |                                                                                |
| GOTERM_BP_FAT        | GO:0048666~neuron development                                    | 3.61 x10 <sup>-2</sup> |                                                                                |
| GOTERM_BP_FAT        | GO:0048858~cell projection morphogenesis                         | 3.78 x10 <sup>-2</sup> |                                                                                |
| GOTERM_BP_FAT        | GO:0000904~cell morphogenesis involved in differentiation        | 4.39 x10 <sup>-2</sup> |                                                                                |
| GOTERM_BP_FAT        | GO:0032990~cell part morphogenesis                               | 4.39 x10 <sup>-2</sup> |                                                                                |
| GOTERM_BP_FAT        | GO:0000902~cell morphogenesis                                    | 4.43 x10 <sup>-2</sup> |                                                                                |
| GOTERM_BP_FAT        | GO:0031175~neuron projection development                         | 4.77 x10 <sup>-2</sup> |                                                                                |
| Annotation Cluster 5 |                                                                  | Enrichment Score: 1.35 |                                                                                |
| GOTERM_CC_FAT        | GO:0005924~cell-substrate adherens junction                      | 5.60 x10 <sup>-3</sup> | Vcl, Sorbs, Ctnnbp, Tns3                                                       |
| GOTERM_CC_FAT        | GO:0030055~cell-substrate junction                               | 6.97 x10 <sup>-3</sup> |                                                                                |
| GOTERM_CC_FAT        | GO:0005912~adherens junction                                     | 2.49 x10 <sup>-2</sup> |                                                                                |
| GOTERM_CC_FAT        | GO:0070161~anchoring junction                                    | 3.63 x10 <sup>-2</sup> |                                                                                |
| GOTERM_CC_FAT        | GO:0005925~focal adhesion                                        | 4.47 x10 <sup>-2</sup> |                                                                                |

**Supplementary Table 3. Gene-specific primers used for QPCR of single-cell cDNA**

| <b>Gene</b>             | <b>5'-primer</b>           | <b>3'-primer</b>            |
|-------------------------|----------------------------|-----------------------------|
| <i>bacillus Lys</i>     | GCCATATCGGCTCGCAAATC       | AACGAATGCCGAAACCTCCTC       |
| <i>bacillus DAP</i>     | CCAGACCGCGGCCTAATAATG      | CGCTTCTTCCACCAGTGCAG        |
| <i>bacillus Phe</i>     | TGAGCTCTAGGCCCAAACGAC      | TCCGGTTTTAGTCGGACGTG        |
| <i>bacillus Thr</i>     | GCCGATGCCGTAAGCAAG         | CAGCTCAGGCACAAGCATCG        |
| <i>GAPDH</i>            | ATGAATACGGCTACAGCAACAGG    | CTCTTGCTCAGTGTCTTGCTG       |
| <i>ALDOA</i>            | TTCAGGCTCTTCCATCACTCTTG    | AGCATTACAGACAACACCGCACAG    |
| <i>Beta actin</i>       | CAGCAAGCAGGAGTACGATGAGTC   | CAGTAACAGTCCGCCTAGAAGCAC    |
| <i>PABPN1</i>           | ACCAGGCATCAGCACAACAGACCG   | CCACTGTAGAATCGAGATCGGGAGCTG |
| <i>Ki67</i>             | GCTTTGAGCTTTCCTGGTCATACTC  | GCTTTATTGGATAGGACAGAGGGC    |
| <i>Ccne1</i>            | TGAGTGCTCCAGAAGCTGCTAAGG   | TGTCATCTGTGAAGAGTCCAGTG     |
| <i>Pax6</i>             | ACAACACAGGCTGTTGGATCGC     | GGCAAATCTTGTGCATCATGGTTTCC  |
| <i>HES1</i>             | TCCTAACGCAGTGTCACCTTCCAG   | CCAAGTTCGTTTTAGTGTCCGTC     |
| <i>HES5</i>             | TTCTTTGTATGGGTGGGTGC       | GAAGCCTTCAGAACAGCCTGTG      |
| <i>Neurog2</i>          | GTCAAAGAGGACTATGGCGTGTG    | TACAGTCTTACGAGGTTCCCCACG    |
| <i>Eomes (Tbr2)</i>     | CAAAGGCATGGGGGCTTATTATGC   | CAAACACCACCAGGTCCATCTGG     |
| <i>Tyh1</i>             | TTGTGTGGTAAAGCAAATGGGC     | CGTAACCCAGAGCATCATGTTGC     |
| <i>Sox2</i>             | CATGAGAGCAAGTACTGGCAAG     | CCAACGATATCAACCTGCATGG      |
| <i>EGFP</i>             | GACGGCGACGTAACCGGCCA       | CAGCTTGCCGGTGGTGCAGA        |
| <b>E11&gt;E14 genes</b> |                            |                             |
| <i>Crabp2</i>           | GCACCAGGGTCTACGTCCGAGA     | TAGCGGGCACGGAAGTCGTC        |
| <i>Dmrt3</i>            | TGCCAACCGACTATGAGCAGGGA    | TGTCTCTGAAAACGGCCCGAGC      |
| <i>Dmrt1</i>            | TGTGTTACCAGGAAGGGTTCCTTAC  | AAAGCTGTAAAGAAACAAGCAGGCA   |
| <i>Lrrn1</i>            | CCTGTGCTTGACCCCTTCTTCTGAAG | CCAAACCCTATGTTAGCTGTTGAGAGG |
| <i>Flrt3</i>            | ACAGAATAATTGTGCTTCTTTCGGGA | TGGGGTTGTTTCGGACTCATGTGC    |
| <i>Tubb3</i>            | CCACCCCGTGGGCTCAAATG       | CCGAGATGCGTTTGACAGCTCCT     |
| <i>Fndc3c1</i>          | TGGGGGCCATATAGTCCCAGTGC    | CACTGCCTTTGCCATGCCCTGAA     |
| <i>Sulf2</i>            | ATGACCGCTCACACGTAACC       | ATTGACACCGCGACTCTTGA        |
| <i>Chst2</i>            | TGGCCACTGTCAGAAAGTCC       | TCCAGCCACAACACTATACAGTGC    |
| <b>E11&lt;E14 genes</b> |                            |                             |
| <i>Zbtb20</i>           | TCCCAGTCCCCCTTGGATGGTG     | GCTAGAGATCCAACCACTGGACCTCC  |
| <i>Ednrb</i>            | ACCCAGGCCACATGTTGAAAATGAGC | ACCTCATTGTCCCGTTTGGGTTTATTG |
| <i>Rlbp1</i>            | CTGCCTGCTGACTTTGGGGGTAC    | TCCCATGGCAGGGCATCTCCTC      |
| <i>Pag1</i>             | CTGACACGGGTGTTTGTCTGTC     | AGCCATCACAAGTTCAACTCCACC    |
| <i>Ptn</i>              | GCTCTGCACAATGCTGACTG       | TCTTTGACTCCGCTTGAGGC        |
| <i>Bai3</i>             | ACACTGAGACTTGGGAAGCC       | GCACAAGAAGGGTCTGACA         |
| <i>Sema5a</i>           | TTTGCCAAGAGCACAGCATTG      | AACGTTGGCAGAGAGACGAT        |
| <i>Epha5</i>            | GTTTCAGGTAGGCCAGAGACA      | TCCTGAATTCATCCTGAGGCAG      |
| <i>Aldoc</i>            | ACCACAGGATGGGAGGGTAG       | CTGTAAGGGCTGGTGGAGAC        |

## SUPPLEMENTARY REFERENCES

1. Kawaguchi, A., *et al.* Single-cell gene profiling defines differential progenitor subclasses in mammalian neurogenesis. *Development* **135**, 3113-3124 (2008).
2. Kwon, G.S. & Hadjantonakis, A.K. Eomes::GFP—a tool for live imaging cells of the trophoblast, primitive streak, and telencephalon in the mouse embryo. *Genesis* **45**, 208-217 (2007).
3. Gong, S., *et al.* A gene expression atlas of the central nervous system based on bacterial artificial chromosomes. *Nature* **425**, 917-925 (2003).
4. Smart, I.H. Proliferative characteristics of the ependymal layer during the early development of the mouse neocortex: a pilot study based on recording the number, location and plane of cleavage of mitotic figures. *J Anat* **116**, 67-91 (1973).
5. Takahashi, T., Goto, T., Miyama, S., Nowakowski, R.S. & Caviness, V.S. Sequence of neuron origin and neocortical laminar fate: relation to cell cycle of origin in the developing murine cerebral wall. *J Neurosci* **19**, 10357-10371 (1999).
